# Supplementary material for: Decreased inter-hemispheric interactions but increased intra-hemispheric integration during typical aging
Source: publisher site journal article supplement (doi:10.18632/aging.102421), 2019-11-21
Supplement: Supplementary file [file aging-v11i22-102421-supplementary-material-SD2.pdf]

## SUPPLEMENTARY TABLE

Supplementary Table 1. Correlation coefficients of age and inter-hemispheric segregation in each hemisphere for 11 identified brain systems after controlling for the participant's sex and mean FD.

| Brain system | Left hemisphere |          | Right hemisphere |          |
|--------------|-----------------|----------|------------------|----------|
|              | <i>r</i>        | <i>p</i> | <i>r</i>         | <i>p</i> |
| DMN1         | 0.08            | 0.102    | 0.30*            | <0.001   |
| DMN2         | 0.10            | 0.041    | 0.15             | 0.002    |
| DMN3         | 0.15            | 0.001    | 0.15             | 0.001    |
| DMN4         | 0.17*           | <0.001   | 0.12             | 0.01     |
| SMN          | 0.08            | 0.107    | 0.17*            | <0.001   |
| AN           | 0.03            | 0.501    | 0.37*            | <0.001   |
| SN           | 0.11            | 0.017    | 0.09             | 0.07     |
| VN           | 0.12            | 0.010    | 0.16             | <0.001   |
| DAN          | 0.19*           | <0.001   | 0.19*            | <0.001   |
| FPN          | 0.30*           | <0.001   | 0.16             | <0.001   |
| VAN          | 0.31*           | <0.001   | 0.15             | 0.001    |

Note: \* Bonferroni correction ( $p < 0.01$ ).
